# Supplementary material
Source: ML conference proceedings conference paper supplement (https://proceedings.neurips.cc/paper_files/paper/2010/hash/4da04049a062f5adfe81b67dd755cecc-Abstract.html)
Supplement: Supplementary file [file 4da04049a062f5adfe81b67dd755cecc-Supplemental.zip]

---

# Supplementary Material for an Efficient Optimization for Discriminative Latent Class Model

---

**Armand Joulin\***  
INRIA  
23, avenue d'Italie,  
75214 Paris, France.  
armand.joulin@inria.fr

**Francis Bach\***  
INRIA  
23, avenue d'Italie,  
75214 Paris, France.  
francis.bach@inria.fr

**Jean Ponce\***  
Ecole Normale Supérieure  
45, rue d'Ulm  
75005 Paris, France.  
jean.ponce@ens.fr

## 1 Approximation of the M-step

Using the relation between  $\theta$  and  $\xi$  given by the M-step, we propose to divide our cost function into a term depending on  $\alpha$ , another depending on  $(w, b)$  and a third one independent of  $\theta$ . Taking the part of our cost function that depends on  $\alpha$ , and replacing  $\alpha$  by its expression, we get the function  $J_\alpha$ :

$$J_\alpha(\xi) = \sum_{k=1}^K \sum_{m=1}^M \left( \frac{1}{N} \sum_{n \in A_m} \xi_{nk} \right) \log \left( \frac{1}{N} \sum_{n \in A_m} \xi_{nk} \right) - \sum_{k=1}^K \left( \frac{1}{N} \sum_{n=1}^N \xi_{nk} \right) \log \left( \frac{1}{N} \sum_{n=1}^N \xi_{nk} \right),$$

where  $A_m$  is the set of  $n$  such as  $y_{nm} = 1$ . Similarly with  $(w, b)$ , we get the function  $J_{wb}$ :

$$J_{wb}(\xi) = \max_{w \in \mathbb{R}^{N \times K}, b \in \mathbb{R}^K} \frac{1}{N} \sum_{n=1}^N \xi_n (w^\top x_n + b) - \frac{1}{N} \sum_{n=1}^N \varphi(w^\top x_n + b) - \frac{\lambda}{2K} \|w\|_F^2,$$

where  $\varphi(u) = \log(\sum_{k=1}^K \exp(u_k))$  is the log-sum exp function and  $\xi_n$  is the  $n$ -th row of  $\xi$ . Finally there is a third term independent of  $\theta$  in  $F(\xi, \theta)$ :

$$J_C(\xi) = -\frac{1}{N} \sum_{n=1}^N \sum_{k=1}^K \xi_{nk} \log \xi_{nk}.$$

We call  $F(\xi)$  the sum of  $J_C(\xi)$ ,  $J_{wb}(\xi)$  and  $J_\alpha(\xi)$ .

### 1.1 Expansion around symmetry

In this supplementary material, we show the second-order approximation of  $J_C(\xi)$ ,  $J_{wb}(\xi)$  and  $J_\alpha(\xi)$  around the symmetric point where each observation has the same probability to be in each cluster, i.e.  $p(z_n = k | x_n) = \frac{1}{K}$ ,  $\xi_0 = \frac{1}{K} \mathbf{1}_N \mathbf{1}_K^T$ .

**Second-order Taylor expansion of  $J_C(\xi)$ .** Using the little-o notation defined as  $a(x) = o(b(x))$  if and only if  $\frac{a(x)}{b(x)} \rightarrow 0$  as  $x \rightarrow 0$ , we obtain:

$$J_C(\xi) = \log(K) - \frac{1}{2} - \frac{K}{2N} \text{tr}(\xi \xi^T) + O(\|\xi - \xi_0\|_F^3).$$

---

\*WILLOW project-team, Laboratoire d'Informatique de l'Ecole Normale Supérieure, (ENS/INRIA/CNRS UMR 8548).

Indeed (we omit the  $O(\|\xi - \xi_0\|_F^3)$  term):

$$\begin{aligned}
J_C(\xi) &= \log(K) + \frac{1}{N}(\log(K) - 1) \sum_{n=1}^N \sum_{k=1}^K (\xi_{nk} - \frac{1}{K}) - \frac{K}{2N} \sum_{n=1}^N \sum_{k=1}^K (\xi_{nk} - \frac{1}{K})^2 \\
&= \log(K) - \frac{K}{2N} \left( \sum_{n=1}^N \sum_{k=1}^K \xi_{nk}^2 + \frac{NK}{K^2} \right) \\
J_C(\xi) &= \log(K) - \frac{1}{2} - \frac{K}{2N} \text{tr}(\xi \xi^T)
\end{aligned}$$

**Second-order Taylor expansion of  $J_\alpha(\xi)$ .** Denoting by  $Y \in \mathbb{R}^{N \times M}$ , the matrix containing the  $y_{nm}$ , we obtain the expression:

$$\begin{aligned}
J_\alpha(\xi) &= -\log(N) + \sum_{m=1}^M \frac{|A_m|}{N} \log(|A_m|) + \frac{K}{2N} \left( \text{tr}(\xi^T Y (Y^T Y)^{-1} Y^T \xi) - \frac{1}{N} \text{tr}(\xi 1_n 1_n^T \xi) \right) \\
&\quad + O(\|\xi - \xi_0\|_F^3),
\end{aligned}$$

since  $Y(Y^T Y)^{-1} Y^T = \sum_{m=1}^M \frac{1}{|A_m|} 1_{A_m} 1_{A_m}^T$ . Indeed:

$$\begin{aligned}
J_\alpha(\xi) &= \frac{1}{N} \sum_{m=1}^M |A_m| \log\left(\frac{|A_m|}{N}\right) - \frac{1}{N} \sum_{m=1}^M \sum_{n=1}^N \mathbb{1}_{n \in A_m} \log\left(\frac{|A_m|}{N}\right) \sum_{k=1}^K (\xi_{nk} - \frac{1}{K}) \\
&\quad + \frac{K}{2N} \sum_{k=1}^K \left( \sum_{m=1}^M \sum_{n,l=1}^N \frac{1}{|A_m|} \mathbb{1}_{(n \in A_m) \cap (l \in A_m)} (\xi_{nk} - \frac{1}{K}) (\xi_{lk} - \frac{1}{K}) - \frac{1}{N} \left( \sum_{n=1}^N \xi_{nk} - \frac{N}{K} \right)^2 \right) \\
&= -\log(N) + \sum_{m=1}^M \frac{|A_m|}{N} \log(|A_m|) + \frac{K}{2N} \sum_{k=1}^K \left( \sum_{m=1}^M \frac{1}{|A_m|} (\xi_k^T 1_{A_m})^2 - \frac{1}{N} \left( \sum_{n=1}^N \xi_{nk} \right)^2 \right) \\
&= -\log(N) + \sum_{m=1}^M \frac{|A_m|}{N} \log(|A_m|) + \frac{K}{2N} \left( \sum_{m=1}^M \frac{1}{|A_m|} \text{tr}(\xi^T 1_{A_m} 1_{A_m}^T \xi) - \frac{1}{N} \text{tr}(\xi 1_n 1_n^T \xi) \right)
\end{aligned}$$

**Second-order Taylor expansion of  $J_{wb}(\xi)$ .** Solving a softmax regression problem is instable because the constant term  $b$  can go to the infinity. A common way to avoid this problem is to add a small regularization of  $b$  (in our case with a coefficient equals to  $10^{-12}$ ).

We note that  $p(z_n = k | x_n) = \frac{1}{K}$  is equivalent to  $w_k^T x_n + b_k = 0$ . Thus we expand the log-sum-exp,  $\varphi$  around 0:

$$\varphi(x) = \log(K) + \frac{1}{K} x^T 1_K + \frac{1}{2K} \|x\|_F^2 - \frac{1}{2K^2} (x^T 1_K)^2 + O(\|x\|_F^3),$$

and substituting in  $J_{wb}(\xi)$  yields:

$$\begin{aligned}
J_{wb}(\xi) &= -\log(K) + \frac{K}{2N} \text{tr}(\xi \Pi_K \xi^T) \\
&\quad - \frac{1}{2K} \min_{w,b} \left[ \frac{1}{N} \|(K\xi - Xw - b)\Pi_K\|_F^3 + \lambda \|w\|_F^2 + O(\|Xw + b\|_F^3) \right],
\end{aligned}$$

where  $\Pi_K = I - \frac{1}{K} 1_K 1_K^T$  and  $X = (x_1, \dots, x_N)^T$ . Indeed:

$$\begin{aligned}
J_{wb}(\xi) &= \max_{w \in \mathbb{R}^{P \times K}, b \in \mathbb{R}^K} \frac{1}{N} \sum_{n=1}^N \xi_n (w^\top x_n + b) \\
&- \frac{1}{N} \sum_{n=1}^N \left[ \log(K) + \frac{1}{K} (w^\top x_n + b)^T \mathbf{1}_K + \frac{1}{2K} \|w^\top x_n + b\|_F^2 \right. \\
&- \left. \frac{1}{2K^2} ((w^\top x_n + b)^T \mathbf{1}_K)^2 \right] - \frac{\lambda}{2K} \|w\|_F^2 + O(\|Xw + b\|_F^3) \\
&= -\log(K) + \max_{w,b} \frac{1}{N} \sum_{n=1}^N \left[ \left( \xi_n - \frac{1}{K} \mathbf{1}_K^\top \right) (w^\top x_n + b) \right. \\
&- \left. \frac{1}{2K} (\|w^\top x_n + b\|_F^2 - ((w^\top x_n + b)^T \frac{1}{K} \mathbf{1}_K)^2) \right. \\
&- \left. \frac{\lambda}{2K} \|w\|_F^2 + O(\|Xw + b\|_F^3) \right] \\
&= -\log(K) \max_{w,b} \frac{1}{2KN} \sum_{n=1}^N \left[ 2(K\xi_n) \Pi_K (w^\top x_n + b) \right. \\
&- \left. \|\Pi_K (w^\top x_n + b)\|_F^2 - \lambda \|w\|_F^2 + O(\|Xw + b\|_F^3) \right] \\
&= -\log(K) + \frac{K}{2N} \text{tr}(\xi \Pi_K \xi^T) - \frac{1}{2K} \min_{w,b} \left[ \frac{1}{N} \|K\xi \Pi_K \right. \\
&- \left. (Xw + b^T) \Pi_K\|_F^2 + \lambda \|w\|_F^2 + O(\|Xw + b\|_F^3) \right].
\end{aligned}$$

Due to the regularization in  $w$  and  $b$ , this cost function is Lipschitzian and the negligible terms in  $(w, b)$  becomes negligible terms in  $\xi - \xi_0$ . Therefore the minimization in respect to  $w$  and  $b$  corresponds to a multi-label classification problem with a square-loss [?, ?, ?]. This problem can be solve in a close form and leads to  $b^* = \frac{1}{N} \mathbf{1}_N \mathbf{1}_N^T (K\xi - Xw)$  and to:

$$N\lambda w + x^T \Pi_N x w \Pi_K = K x^T \Pi_N \xi,$$

and substituting in  $J_{wb}(\xi)$  yields:

$$J_{wb}(\xi) = \log(K) - \frac{1}{2} + \frac{c(x)}{2N} + \frac{K}{2} \text{tr} \left[ \xi \xi^T \left( \frac{1}{N} I - A(x, \lambda) \right) \right] + O(\|\xi - \xi_0\|_F^3),$$

where  $c(x) = \text{tr}(\mathbf{1}_N \mathbf{1}_N^T (A(x, \lambda) - \Pi_N))$  and  $A(x, \lambda) = \Pi_N (I - x(N\lambda I + x^T \Pi_N x)^{-1} x^T) \Pi_N$ .

**Second-order Taylor expansion.** Finally combining these three terms and dropping the constant in  $\xi$ , we obtain:

$$F(\xi) = \frac{K}{2} \text{tr} \left[ \xi \xi^T \left( \frac{1}{N} (Y(Y^T Y)^{-1} Y^T - \frac{1}{N} \mathbf{1}_N \mathbf{1}_N^T) - A(x, \lambda) \right) \right]. \quad (1)$$

## General case reformulation

We consider the problem:

$$\min \frac{1}{2} v^T Q v \quad \text{s.t. } v \in \mathbb{R}^{NK}, v \geq 0 \text{ and } (I_N \otimes \mathbf{1}_K^T) v = \mathbf{1}_N. \quad (2)$$

### 1.1.1 Problem reformulation

The set of completely positive matrices ( $\mathcal{CP}_N$ ) is defined by:

$$\mathcal{CP}_N = \{M \in \mathbb{R}^{N \times N} | \exists p \in \mathbb{N}^*, \exists U \in \mathbb{R}^{N \times p}, U \geq 0, M = U U^T\}$$

Denoting by  $T = yy^T$ , the  $NK \times NK$  matrix, we consider its block matrix decomposition into  $N \times N$  blocks of size  $K \times K$ :

$$T = \begin{bmatrix} T_{11} & T_{12} & \dots & T_{1N} \\ T_{21} & \ddots & & \vdots \\ \vdots & & \ddots & \vdots \\ T_{N1} & \dots & \dots & T_{NN} \end{bmatrix}.$$

A  $NK \times NK$  matrix  $T$  can be written as  $T = yy^T$  if and only if it verifies the following conditions:

$$- T \in \mathcal{CP}_{NK}, \quad (3)$$

$$- \forall n, m \in \{1, \dots, N\}, 1_K^T T_{nm} 1_K = 1, \quad (4)$$

$$- \forall n, i, j \in \{1, \dots, N\}, T_{ni} 1_K = T_{nj} 1_K, \quad (5)$$

$$- \text{rank}(T) = 1. \quad (6)$$

Therefore the optimization problem (2) is equivalent to minimizing  $\frac{1}{2} \text{tr}(TQ)$  over this set of constraints. However, these constraints do not define a convex set. In the next section we propose a convex relaxation based on the same idea as the simple case and a lowrank reformulation.

### 1.1.2 Relaxation

Dropping the rank condition leads to a matrix  $U$  such as  $T = UU^T$  with  $\forall(i, j), U_{ij} \geq 0$  and with at most a rank  $R$  (with  $R > 1$ ). We note  $U_r$  the  $r$ -th column of  $U$ ,  $U_r^n$  the  $n$ -th  $K$ -vector such as  $U_r = (U_r^1, \dots, U_r^N)^T$  and  $U^n = (U_1^n, \dots, U_R^n)$ .

Since  $T_{nm} = \sum_{r=1}^R U_r^n (U_r^m)^T$ , conditions (4) and (5) can be replaced by conditions on  $U$ .

Condition (5) becomes for all  $m$ ,  $\sum_{r=1}^R 1^T U_r^m U_r^n = \sum_{r=1}^R 1^T U_r^n U_r^n$ . Since, there are  $N$  such equalities for each  $U^n$ , this implies that for all  $m$ ,  $1^T U_r^m = 1^T U_r^n$ . Adding  $U \geq 0$ , we have the new condition:

$$\forall(n, m) \leq N, \|U_r^m\|_1 U_r^n = \|U_r^n\|_1 U_r^n.$$

this condition means  $\forall m \leq N, \|U_r^m\|_1 = \|U_r^n\|_1$ , and therefore (4) can be reformulated:

$$\forall n \leq N, \sum_{r=1}^R (\|U_r^n\|_1)^2 = 1.$$

As in the simple case, we drop this condition by using a scale invariant cost function.

Finally, defining by  $\mathcal{C}_1$ , the set of constraints:

$$\mathcal{C}_1 = \{U_r \in \mathbb{R}^{NK} \mid U_r \geq 0, \forall n, m, \|U_r^n\|_1 = \|U_r^m\|_1\},$$

leads to a new formulation:

$$\min \frac{1}{2} \text{tr}(UD^{-1}U^T Q) \quad \text{s.t.} \quad U \in \mathbb{R}^{NK \times R} \quad \text{and} \quad \forall r, U_r \in \mathcal{C}_1. \quad (7)$$

where  $D = \text{diag}((I_N \otimes 1_K)^T U U^T (I_N \otimes 1_K))$  and  $\text{diag}(A)$  is the diagonal matrix with the diagonal of  $A$ .

## 1.2 Notes on the projection on $\mathcal{C}_1$

**Remark on the projection.** There is a linear function between the  $\lambda_n$  and  $a$  [?], which yields that, for a given active set,  $L(a)$  is a quadratic function of  $a$ . Since  $L(a)$  is also continuous,  $L(a)$  is piecewise quadratic. It means that for each segment there is we can evaluate the best  $a$  in close form. However, there are  $K^N$  different segments.

**Complexity.** For the binary search, the bottleneck of this projection is to sort the coefficients of each  $Z^n$  at the beginning. The overall complexity is therefore  $O(NK \log(K))$ .

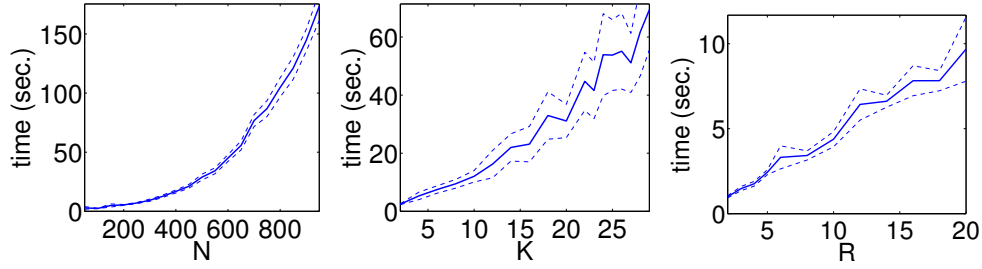

Figure 1: Running time as a function of  $N$ ,  $K$ , and  $R$ .

## 2 Results

### 2.1 Running time

Empirically, we have verified this complexity on a toy example. Results are shown Fig. 1. We experiment the running time of our algorithm on 50 random matrices  $Q$  obtained with a uniform distribution over  $[0, 1]$  for increasing values of  $N$ ,  $K$ , and  $R$ .

### 2.2 Application to classification

Figure 2 shows all the results on the five binary classification tasks on *20 Newsgroups* dataset<sup>1</sup>. Since each document has 13312 entries, we set our degree of freedom at  $df = 500$  and deduce from it the value of our regularization parameter  $\lambda$ . We use 50 random initializations for our algorithm. We compare our method with classifiers such as the linear SVM and the supervised Latent Dirichlet Allocation (sLDA) classifier of Blei et al. [?]. We also compare our results to those obtained by an SVM using on the features obtained with rank reducing methods such as the LDA of Blei et al. [?] and the PCA. For these models, we select their parameters with 5-fold cross-validation.

<sup>1</sup><http://people.csail.mit.edu/jrennie/>

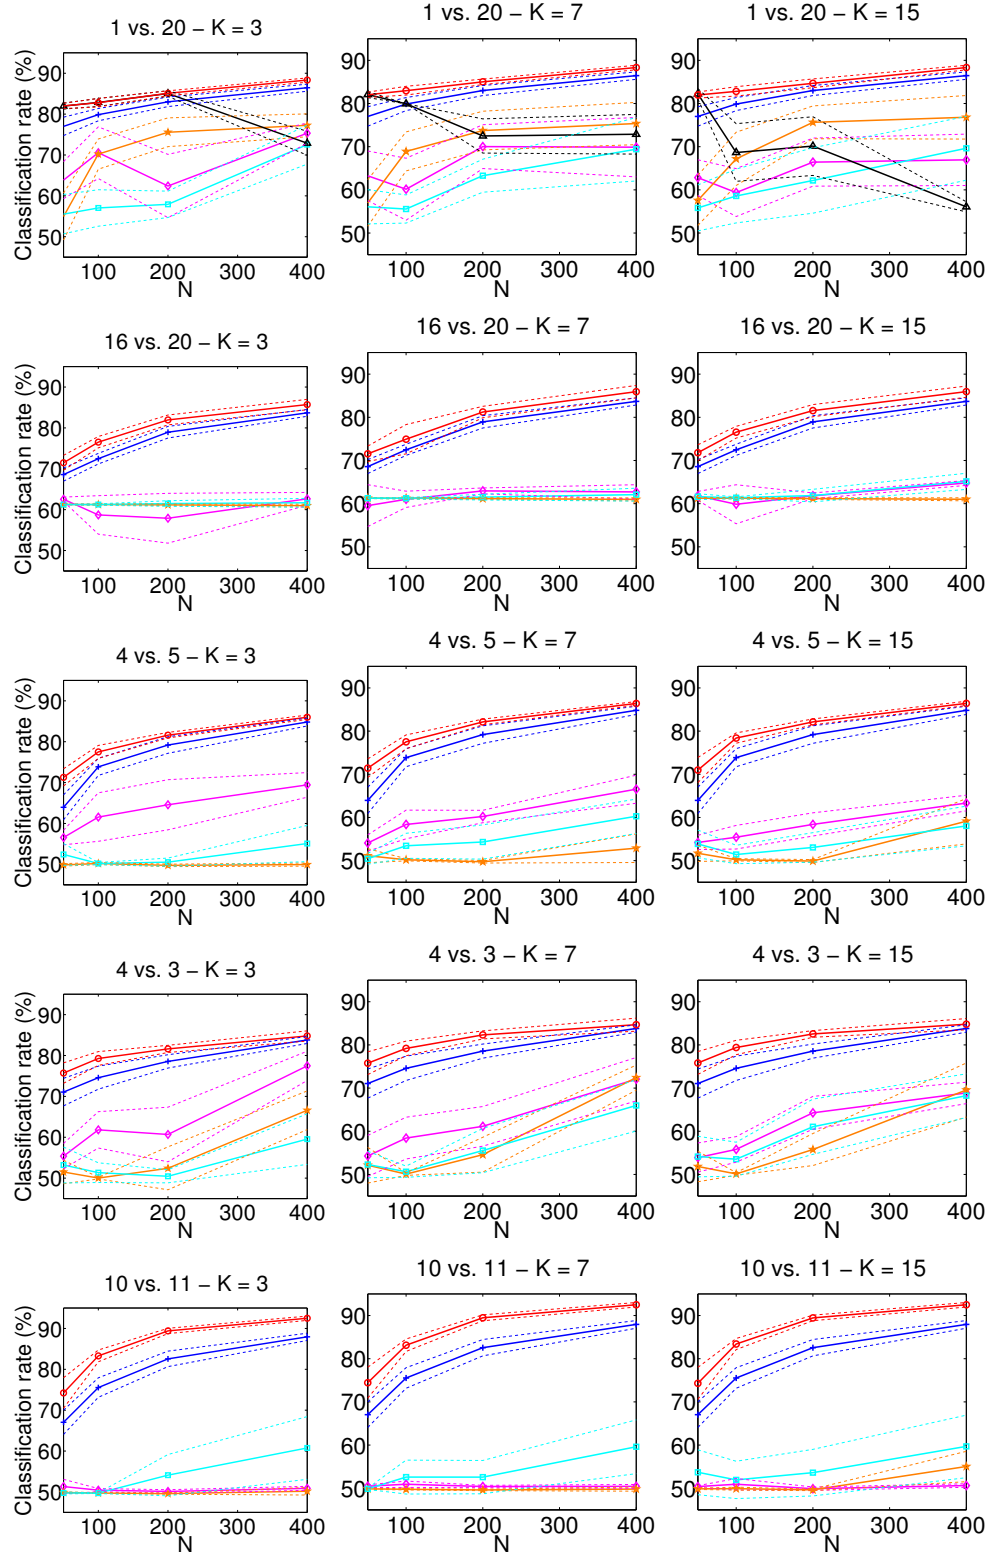

Figure 2: Classification rate for several binary classification tasks (from to bottom) and for different number of class  $K$  (or topics) (from left to right). (Same legend as in the paper).
